# Supplementary material for: Aiding Cancer’s “Sweet Tooth”: Role of Hexokinases in Metabolic Reprogramming
Source: Preprints.org preprint supplement (doi:10.20944/preprints202303.0440.v1), 2023-03-27
Supplement: Supplementary file 1 [file supplementary]

**Figure Legends:**

Supplementary Fig 1: Protein sequence alignment of HK1, HK2, HK3, GCK, and HKDC1 was done using the Uniport website (www.uniport.org), and the percent identity matrix for the five hexokinase isoforms was downloaded.

Supplementary Fig 2: **A)** mRNA expression data of HK1, HK2, HK3, GCK, and HKDC1 in various types of cancer in human patients were mined from The Cancer Genome Atlas (TCGA) data set using the GEPIA2 website (<http://gepia2.cancer-pku.cn/#index>) and used to form a heatmap showing expression of the five HK isoforms in different cancers. Supplementary Table 1 lists all abbreviations for the tumor types in this figure.

**Supplementary Table 1: TCGA study abbreviations**

| ACC | Adrenocortical carcinoma |
| --- | --- |
| BLCA | Bladder Urothelial Carcinoma |
| LGG | Brain Lower Grade Glioma |
| BRCA | Breast invasive carcinoma |
| CESC | Cervical squamous cell carcinoma and endocervical adenocarcinoma |
| CHOL | Cholangiocarcinoma |
| LCML | Chronic Myelogenous Leukemia |
| COAD | Colon adenocarcinoma |
| CNTL | Controls |
| ESCA | Esophageal carcinoma |
| FPPP | FFPE Pilot Phase II |
| GBM | Glioblastoma multiforme |
| HNSC | Head and Neck squamous cell carcinoma |
| KICH | Kidney Chromophobe |
| KIRC | Kidney renal clear cell carcinoma |
| KIRP | Kidney renal papillary cell carcinoma |
| LIHC | Liver hepatocellular carcinoma |
| LUAD | Lung adenocarcinoma |
| LUSC | Lung squamous cell carcinoma |
| DLBC | Lymphoid Neoplasm Diffuse Large B-cell Lymphoma |
| MESO | Mesothelioma |
| MISC | Miscellaneous |
| OV | Ovarian serous cystadenocarcinoma |
| PAAD | Pancreatic adenocarcinoma |
| PCPG | Pheochromocytoma and Paraganglioma |
| PRAD | Prostate adenocarcinoma |
| READ | Rectum adenocarcinoma |
| SARC | Sarcoma |
| SKCM | Skin Cutaneous Melanoma |
| STAD | Stomach adenocarcinoma |

Supplementary Fig 1

Supplementary Fig 2
